# Supplementary material
Source: publisher figshare collection journal article supplement (https://acs.figshare.com/ndownloader/files/4596331)
Supplement: Supplementary file 1 [file 4596331]

# Supporting Information

## 1- Molecular Structure and Magnetic Properties of 1-Ethyl-2-(1-oxyl-3-oxo-4,4,5,5-tetramethylimidazolin-2-yl)-3-methylimidazolium Arylcarboxylates and Other Salts

Hiroyuki Hayashi, Satoru Karasawa, and Noboru Koga\*

Graduate School of Pharmaceutical Sciences, Kyushu University, 3-1-1 Maidashi, Higashi-ku,  
Fukuoka, 812-8582 Japan. koga@fc.phar.kyushu-u.ac.jp

### Table of Contents

S1. General method

S2. ORTEP drawings of  $[\text{EMINN}]^+[\text{Br}]^-$ ,  $[\text{EMINN}]^+[\text{I}]^-$ ,  $[\text{EMINN}]^+[\text{TFSI}]^-$ ,  $[\text{EMINN}]^+[\text{BPh}_4]^-$ ,  $[\text{EMINN}]^+[\text{BANN}]^-$ ,  $[\text{EMINN}]^+{}_2[\text{BA}_2]^{2-}$ ,  $[\text{EMINN}]^+{}_3[\text{BA}_3]^{3-}$  (Figure S1) and Crystallographic data and experimental details for  $[\text{EMINN}]^+[\text{X}]^-$ , X = Br, I, TFSI, and BPh<sub>4</sub> (Table S1) and  $[\text{EMINN}]^+[\text{BANN}]^-$ ,  $[\text{EMINN}]^+{}_2[\text{BA}_2]^{2-}$ , and  $[\text{EMINN}]^+{}_3[\text{BA}_3]^{3-}$  (Table S2)

S3. Dimer structure and packing diagram with a ball-stick model for  $[\text{EMINN}]^+[\text{I}]^-$  and  $[\text{EMINN}]^+[\text{TFSI}]^-$ . (Figure S2)

S4. Plots of  $\chi_{mol}T$  vs.  $T$  of  $[\text{EMINN}]^+[\text{I}]^-$  and  $[\text{EMINN}]^+[\text{TFSI}]^-$  (Figure S3)

S5. ESI mass spectra of  $[\text{EMINN}]^+[\text{Br}]^-$ ,  $[\text{EMINN}]^+[\text{I}]^-$ ,  $[\text{EMINN}]^+[\text{TFSI}]^-$ ,  $[\text{EMINN}]^+[\text{BA}]^-$ ,  $[\text{EMINN}]^+[\text{BANN}]^-$ ,  $[\text{EMINN}]^+{}_2[\text{BA}_2]^{2-}$ , and  $[\text{EMINN}]^+{}_3[\text{BA}_3]^{3-}$  (Figure S4).

S6. The plots of  $1/T_1$  and  $1/T_2$  vs. Conc. of  $[\text{EMINN}]^+[\text{Br}]^-$ ,  $[\text{EMINN}]^+[\text{BA}]^-$ ,  $[\text{EMINN}]^+[\text{BANN}]^-$ ,  $[\text{EMINN}]^+{}_2[\text{BA}_2]^{2-}$ , and  $[\text{EMINN}]^+{}_3[\text{BA}_3]^{3-}$  in aqueous solution. (Figure S5)

S7. ESR spectra of  $[\text{EMINN}]_2^+[\text{BA}_2]^{2-}$  and  $[\text{EMINN}]_3^+[\text{BA}_3]^{3-}$  in 5 % EtOH/toluene at room temperature. (Figure S6)

**S1. General Methods.** Infrared spectra were recorded on a FT-IR spectrometer.  $^1\text{H}$  NMR spectra were measured on a 270 MHz spectrometer using  $\text{CDCl}_3$  as solvent and referenced to TMS. FAB mass spectra (FAB MS) were recorded on a spectrometer and ESI mass spectra were measured on a spectrometer in the positively charged mode. Melting points were obtained with a heating block and are uncorrected. Elemental analyses were performed in the Analytical Center of Faculty of Science in Kyushu University.

S2. ORTEP drawing (Figure S1)

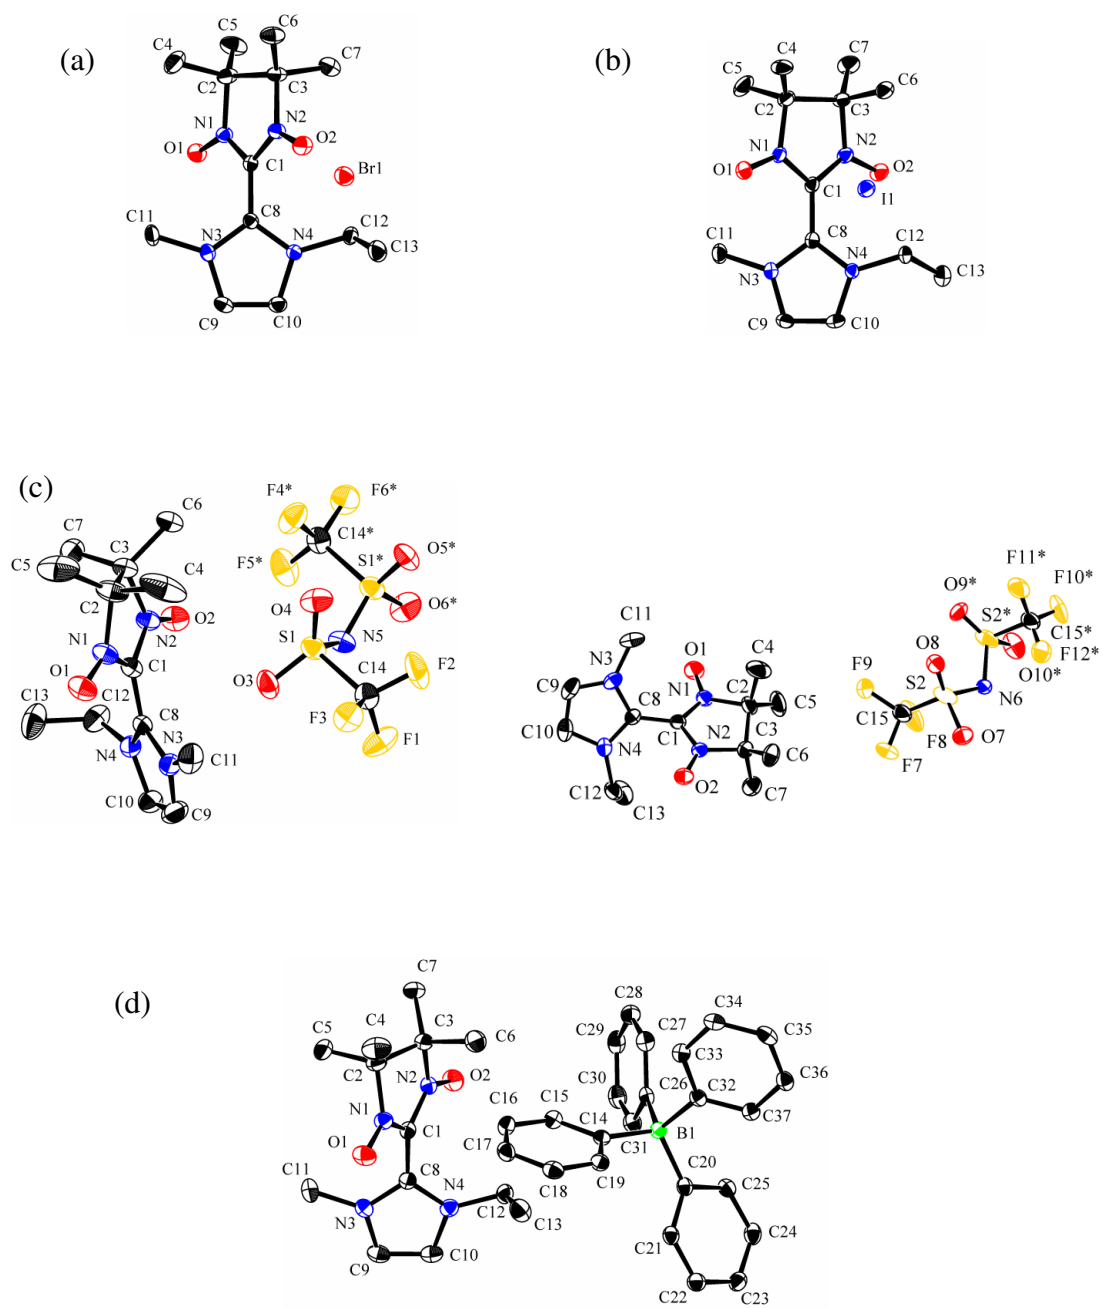

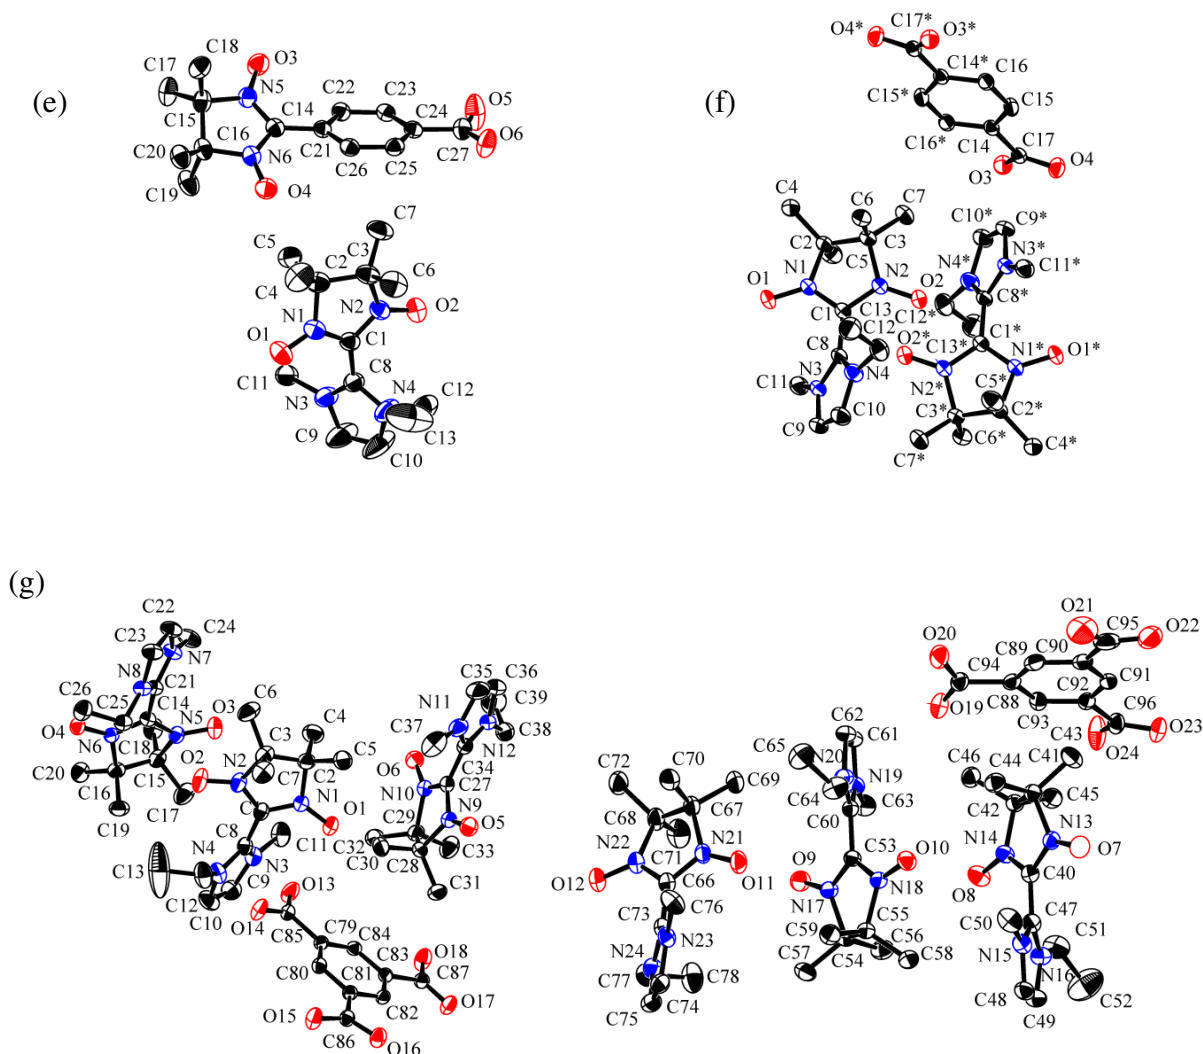

Figure S1. ORTEP drawings of (a)  $[\text{EMINN}]^+[\text{Br}]^-$ , (b)  $[\text{EMINN}]^+[\text{I}]^-$ , (c)  $[\text{EMINN}]^+[\text{TFSI}]^-$ , (d)  $[\text{EMINN}]^+[\text{BPh}_4]^-$ , (e)  $[\text{EMINN}]^+[\text{BANN}]^-$ , (f)  $[\text{EMINN}]_2^+[\text{BA}_2]^{2-}$ , and (g)  $[\text{EMINN}]_3^+[\text{BA}_3]^{3-}$ .

Table S1. Crystallographic data and experimental details for  $[\text{EMINN}]^+[\text{X}]^-$ ,  $\text{X} = \text{Br}, \text{I}, \text{TFSI}$ , and  $\text{BPh}_4$ .

|                     | $[\text{EMINN}]^+[\text{Br}]^-$                           | $[\text{EMINN}]^+[\text{I}]^-$                           | $[\text{EMINN}]^+[\text{TFSI}]^-$                                    | $[\text{EMINN}]^+[\text{BPh}_4]^-$                       |
|---------------------|-----------------------------------------------------------|----------------------------------------------------------|----------------------------------------------------------------------|----------------------------------------------------------|
| empirical formula   | $\text{C}_{13}\text{H}_{22}\text{O}_2\text{N}_4\text{Br}$ | $\text{C}_{13}\text{H}_{22}\text{O}_2\text{N}_4\text{I}$ | $\text{C}_{15}\text{H}_{22}\text{F}_6\text{O}_6\text{N}_5\text{S}_2$ | $\text{C}_{37}\text{H}_{42}\text{O}_2\text{N}_4\text{B}$ |
| formula weight      | 346.25                                                    | 393.25                                                   | 546.48                                                               | 585.57                                                   |
| crystal class       | monoclinic                                                | monoclinic                                               | triclinic                                                            | monoclinic                                               |
| space group         | $\text{P}2_1/\text{c}$ (No.14)                            | $\text{P}2_1/\text{n}$ (No.14)                           | $\text{P}-1$ (No.2)                                                  | $\text{P}2_1/\text{c}$ (No.14)                           |
| $a/\text{\AA}$      | 8.1985(3)                                                 | 8.329(7)                                                 | 10.041(3)                                                            | 11.0929(4)                                               |
| $b/\text{\AA}$      | 9.3294(4)                                                 | 9.432(9)                                                 | 10.534(4)                                                            | 13.9282(5)                                               |
| $c/\text{\AA}$      | 21.0272(6)                                                | 21.42(2)                                                 | 12.180(4)                                                            | 20.9843(6)                                               |
| $\alpha/\text{deg}$ |                                                           |                                                          | 67.590(9)                                                            |                                                          |
| $\beta/\text{deg}$  | 102.2128(9)                                               | 101.58(4)                                                | 80.391(7)                                                            | 103.0763(10)                                             |
| $\gamma/\text{deg}$ |                                                           |                                                          | 85.956(9)                                                            |                                                          |
| $V/\text{\AA}^3$    | 1571.91(9)                                                | 1648.8(26)                                               | 1174.3(7)                                                            | 3158.10(18)                                              |

|                                   |                    |                    |                    |                    |
|-----------------------------------|--------------------|--------------------|--------------------|--------------------|
| $\mu/\text{cm}^{-1}$              | 26.303             | 19.505             | 3.152              | 0.762              |
| $Z$                               | 4                  | 4                  | 2                  | 4                  |
| crystal size / mm                 | 0.40 x 0.30 x 0.30 | 0.50 x 0.40 x 0.30 | 0.80 x 0.70 x 0.60 | 0.40 x 0.40 x 0.20 |
| $D_{\text{calc}}/\text{gcm}^{-3}$ | 1.463              | 1.584              | 1.545              | 1.231              |
| $F(000)$                          | 716.00             | 788.00             | 562.00             | 1252.00            |
| radiation                         | Mo- $K_{\alpha}$   | Mo- $K_{\alpha}$   | Mo- $K_{\alpha}$   | Mo- $K_{\alpha}$   |
| $T/\text{K}$                      | 138                | 123                | 123                | 130                |
| no. reflections measured          | 6138               | 7125               | 11369              | 14033              |
| no. unique reflections            | 3421               | 3761               | 5263               | 7154               |
| no. reflections observed          | 3421(all)          | 3761(all)          | 5263(all)          | 7154(all)          |
| no. parameters                    | 270                | 182                | 495                | 566                |
| $R_1$                             | 0.0358             | 0.0299             | 0.0483             | 0.0539             |
| $wR_2$                            | 0.0946             | 0.0789             | 0.1431             | 0.1345             |
| GOF                               | 1.058              | 0.950              | 1.120              | 1.043              |

$$^a R_1 = \sum \|F_0\| - |F_c| / \sum \|F_0\|; wR_2 = \{ \sum w(F_0^2 - F_c^2)^2 / \sum w(F_0^2)^2 \}^{1/2}$$

Table S2. Crystallographic data and experimental details for  $[\text{EMINN}]^+[\text{BANN}]^-$ ,  $[\text{EMINN}]_2^+[\text{BA}_2]^{2-}$ , and  $[\text{EMINN}]_3^+[\text{BA}_3]^{3-}$ .

|                                   | $[\text{EMINN}]^+[\text{BANN}]^-$                                             | $[\text{EMINN}]_2^+[\text{BA}_2]^{2-}$                                      | $[\text{EMINN}]_3^+[\text{BA}_3]^{3-}$                                             |
|-----------------------------------|-------------------------------------------------------------------------------|-----------------------------------------------------------------------------|------------------------------------------------------------------------------------|
| empirical formula                 | $\text{C}_{27}\text{H}_{38}\text{O}_6\text{N}_6 \cdot 1.5 \text{H}_2\text{O}$ | $\text{C}_{34}\text{H}_{48}\text{O}_8\text{N}_8 \cdot 4 \text{H}_2\text{O}$ | $\text{C}_{48}\text{H}_{69}\text{O}_{12}\text{N}_{12} \cdot 10 \text{H}_2\text{O}$ |
| formula weight                    | 568.65                                                                        | 768.86                                                                      | 1166.14                                                                            |
| crystal class                     | monoclinic                                                                    | triclinic                                                                   | triclinic                                                                          |
| space group                       | $P2_1/c$ (No.14)                                                              | $P-1$ (No.2)                                                                | $P-1$ (No.2)                                                                       |
| $a/\text{\AA}$                    | 6.1258(3)                                                                     | 8.3259(5)                                                                   | 16.875(5)                                                                          |
| $b/\text{\AA}$                    | 35.4226(17)                                                                   | 10.4511(7)                                                                  | 20.251(5)                                                                          |
| $c/\text{\AA}$                    | 13.6162(7)                                                                    | 12.6849(9)                                                                  | 20.322(5)                                                                          |
| $\alpha/\text{deg}$               |                                                                               | 69.5550(19)                                                                 | 59.287(5)                                                                          |
| $\beta/\text{deg}$                | 95.8160(19)                                                                   | 75.3050(18)                                                                 | 85.537(5)                                                                          |
| $\gamma/\text{deg}$               |                                                                               | 77.6580(16)                                                                 | 79.624(5)                                                                          |
| $V/\text{\AA}^3$                  | 2939.4(3)                                                                     | 990.83(12)                                                                  | 5872(3)                                                                            |
| $\mu/\text{cm}^{-1}$              | 0.947                                                                         | 0.981                                                                       | 1.051                                                                              |
| $Z$                               | 4                                                                             | 1                                                                           | 4                                                                                  |
| crystal size / mm                 | 0.8 x 0.40 x 0.10                                                             | 0.40 x 0.30 x 0.30                                                          | 0.6 x 0.50 x 0.40                                                                  |
| $D_{\text{calc}}/\text{gcm}^{-3}$ | 1.285                                                                         | 1.288                                                                       | 1.319                                                                              |
| $F(000)$                          | 1216.00                                                                       | 412.00                                                                      | 2468.00                                                                            |
| radiation                         | Mo- $K_{\alpha}$                                                              | Mo- $K_{\alpha}$                                                            | Mo- $K_{\alpha}$                                                                   |
| $T/\text{K}$                      | 123                                                                           | 133                                                                         | 133                                                                                |
| no. reflections measured          | 26969                                                                         | 7071                                                                        | 43631                                                                              |
| no. unique reflections            | 6370                                                                          | 4306                                                                        | 24146                                                                              |
| no. reflections observed          | 6370(all)                                                                     | 4306(all)                                                                   | 24146(all)                                                                         |
| no. parameters                    | 371                                                                           | 261                                                                         | 1478                                                                               |
| $R_1$                             | 0.0630                                                                        | 0.0650                                                                      | 0.0728                                                                             |
| $wR_2$                            | 0.1821                                                                        | 0.2258                                                                      | 0.1042                                                                             |
| GOF                               | 1.084                                                                         | 1.061                                                                       | 1.079                                                                              |

$$^a R_1 = \sum \|F_0\| - |F_c| / \sum \|F_0\|; wR_2 = \{ \sum w(F_0^2 - F_c^2)^2 / \sum w(F_0^2)^2 \}^{1/2}$$

### S3. Crystal structure (Figure S2)

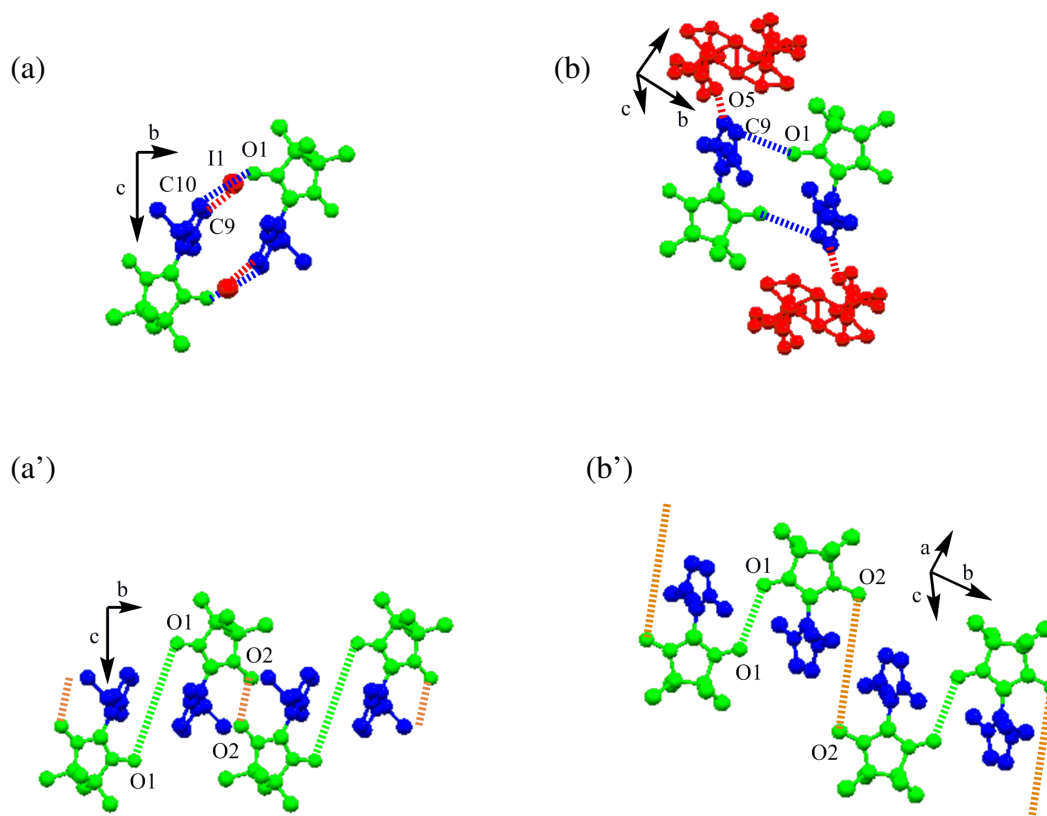

Figure S2. Dimer structure (upper ) and packing diagram (lower) with a ball-stick model (color code: NN moiety, green; Im-cation, blue; anion, red) for ((a) and (a'), respectively)  $[\text{EMINN}]^+[\text{I}]^-$  and ((b) and (b')), respectively)  $[\text{EMINN}]^+[\text{TFSI}]^-$ . In (a) and (b), the short O(NN)-C(Im) and anion-C(Im) contacts within the dimers are indicated by the blue and red dashed lines, respectively. In (a') and (b'), the anion units are omitted for the sake of clarity and the short NO-NO contacts within and between dimers are indicated by the green and orange dashed lines, respectively.

S4. the  $\chi_{mol}T$  vs.  $T$  plots of  $[\text{EMINN}]^+ [\text{I}]^-$  and  $[\text{EMINN}]^+ [\text{TFSI}]^-$  (Figure S3)

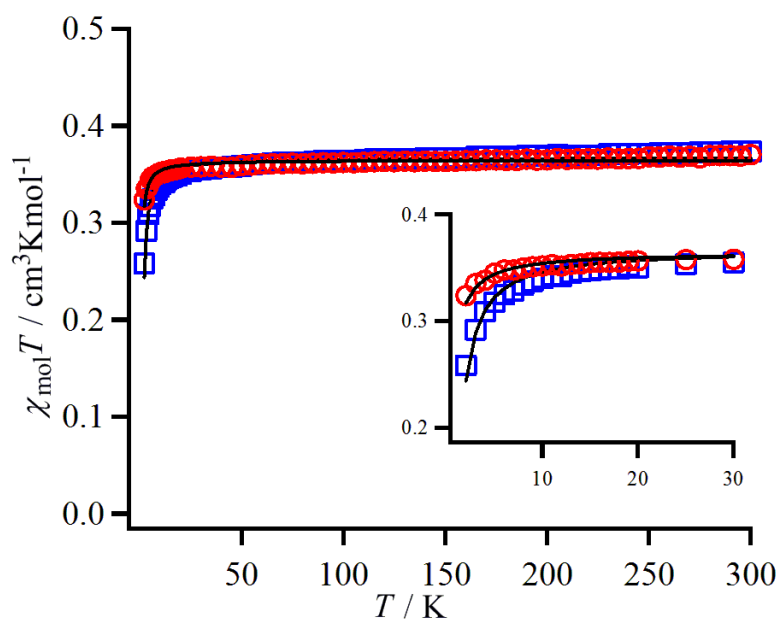

Figure S3. Plots of  $\chi_{mol}T$  vs.  $T$  of  $[\text{EMINN}]^+ [\text{I}]^-$  (○) and  $[\text{EMINN}]^+ [\text{TFSI}]^-$  (□). The solid lines are fitting theoretical curves with the optimized parameters.



# S5. ESI mass spectra (Figure S4)

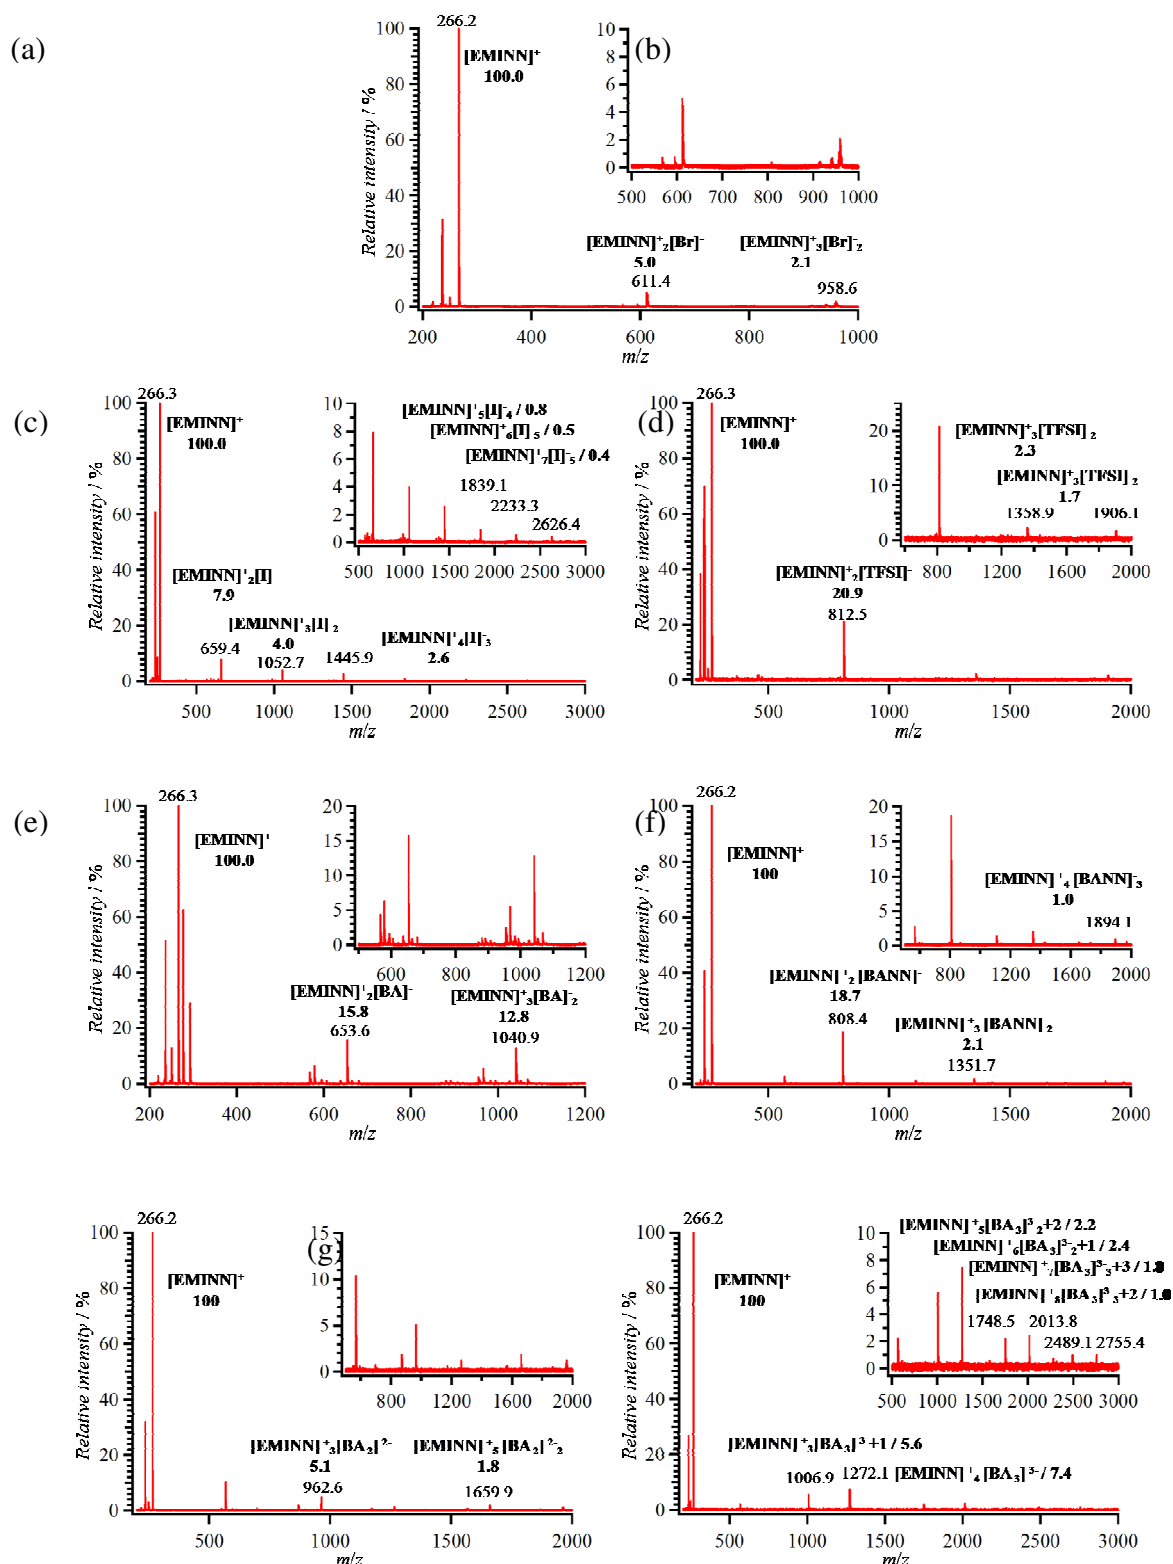

Figure S4. ESI mass spectra of (a)  $[\text{EMINN}]^+[\text{Br}]^-$ , (b)  $[\text{EMINN}]^+[\text{I}]^-$ , (c)  $[\text{EMINN}]^+[\text{TFSI}]^-$ , (d)  $[\text{EMINN}]^+[\text{BA}]^-$ , (e)  $[\text{EMINN}]^+[\text{BANN}]^-$ , (f)  $[\text{EMINN}]^+_2[\text{BA}_2]^{2-}$ , and (g)  $[\text{EMINN}]^+_3[\text{BA}_3]^{3-}$ .

S6. the spin-lattice and the spin-spin relaxation rate ( $1/T_1$  and  $1/T_2$ ) in solution (Figure S5)

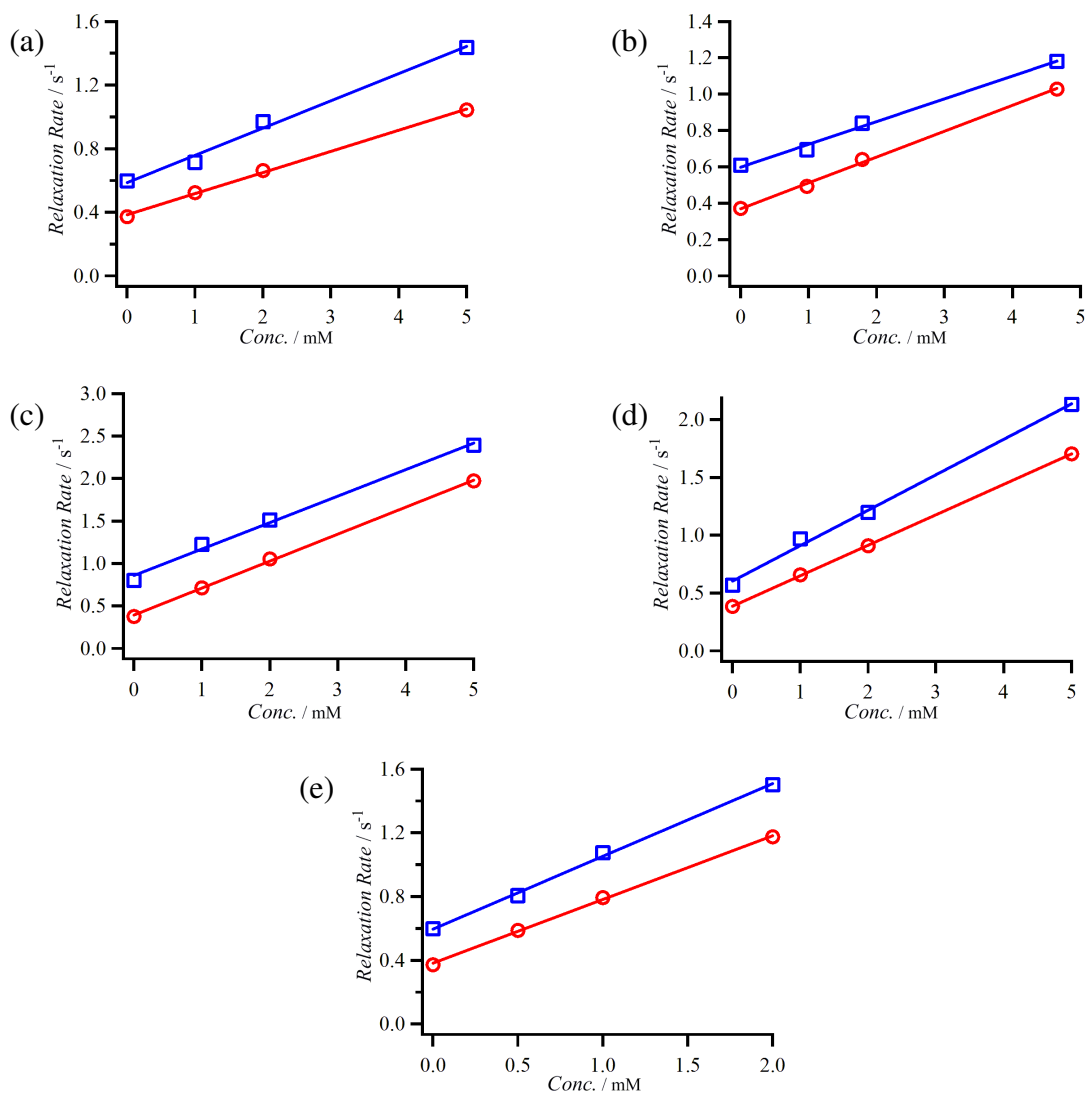

Figure S5. The plots of  $1/T_1$ (○) and  $1/T_2$ (□) vs. Conc. of (a) [EMINN]<sup>+</sup>[Br]<sup>-</sup>, (b) [EMINN]<sup>+</sup>[BA]<sup>-</sup>, (c) [EMINN]<sup>+</sup>[BANN]<sup>-</sup>, (d) [EMINN]<sub>2</sub><sup>+</sup>[BA<sub>2</sub>]<sup>2-</sup>, and (e) [EMINN]<sub>3</sub><sup>+</sup>[BA<sub>3</sub>]<sup>3-</sup> in aqueous solution. The solid lines are fitting theoretical curves with the optimized parameters. See in the text.

S7. ESR spectra of  $[\text{EMINN}]^+_2[\text{BA}_2]^{2-}$  and  $[\text{EMINN}]^+_3[\text{BA}_3]^{3-}$  (Figure S6)

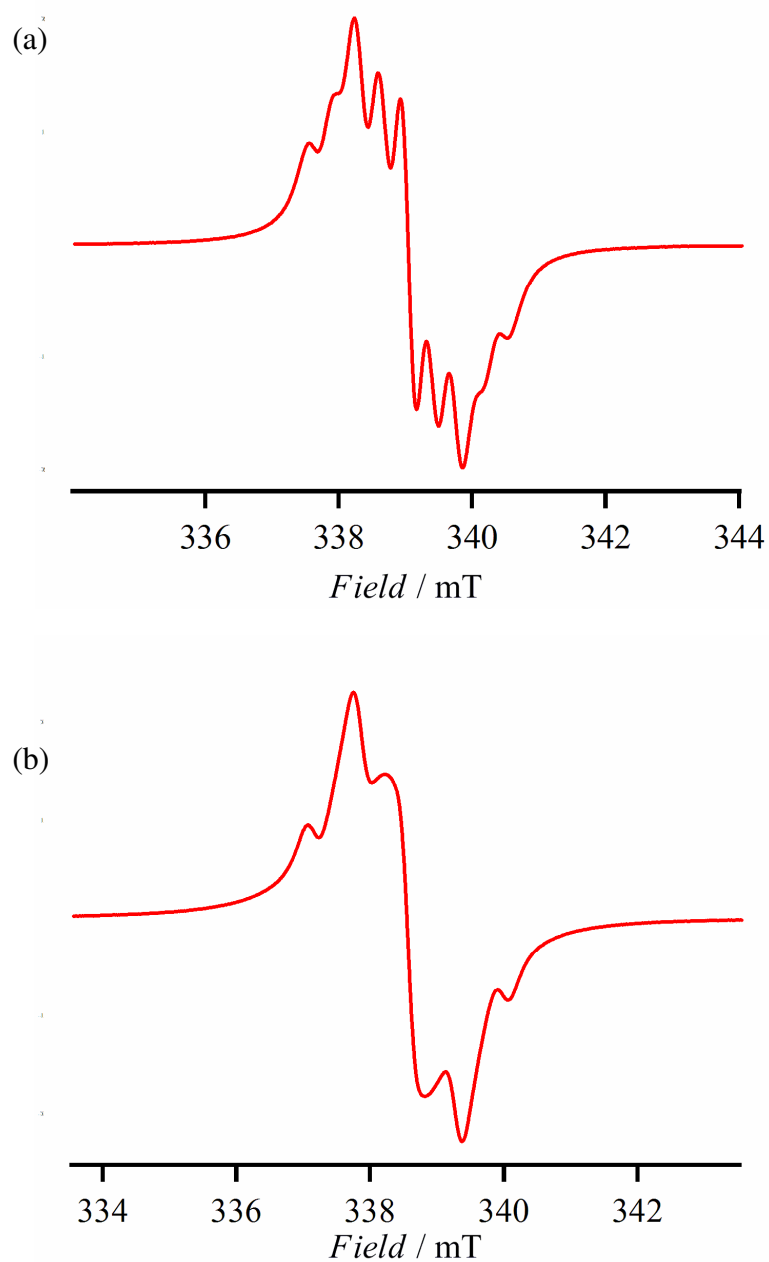

Figure S6. ESR spectra (1mM) of (a)  $[\text{EMINN}]^+_2[\text{BA}_2]^{2-}$  and (b)  $[\text{EMINN}]^+_3[\text{BA}_3]^{3-}$  in 5 % EtOH/toluene at room temperature.
